# Supplementary material
Source: publisher figshare collection journal article supplement (https://acs.figshare.com/ndownloader/files/25587292)
Supplement: Supplementary file 1 [file 25587292]

Supporting Information

(A)

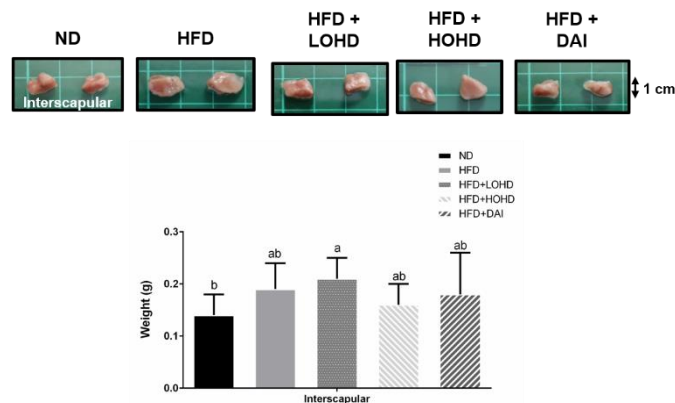

(B)

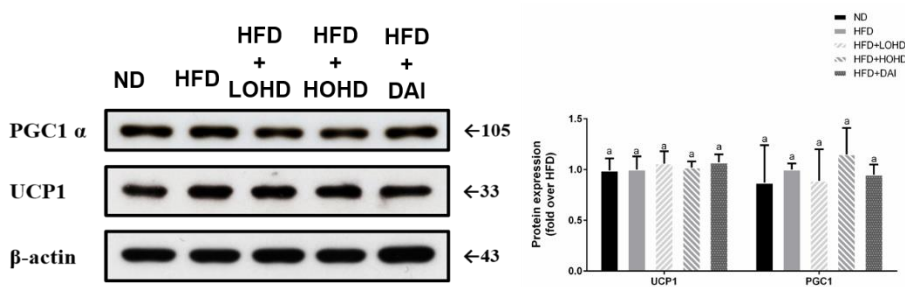

Supplementary Figure 1. Effect of 3'-OHD and Daidzein on BAT in C57BL/6 mice fed

a HFD. (A) Inguinal fat weights. (B) PGC1 $\alpha$  and UCP1 protein expression.
